# Supplementary material for: Associations of Dietary Patterns with Incident Depression: The Maastricht Study
Source: PubMed Central journal article supplement (PMC8004955; doi:10.3390/nu13031034), 2021-03-23
Supplement: nutrients-13-01034-s001.pdf [file nutrients-13-01034-s001.pdf]

Supplementary

# Associations of Dietary Patterns with Incident Depression: the Maastricht Study

Vincenza Gianfredi <sup>1,2,3</sup>, Annemarie Koster <sup>1,4</sup>, Anna Odone <sup>5</sup>, Andrea Amerio <sup>6,7,8</sup>, Carlo Signorelli <sup>3</sup>, Nicolaas C. Schaper <sup>1,2,9</sup>, Hans Bosma <sup>1,4</sup>, Sebastian Köhler <sup>10,11</sup>, Pieter C. Dagnelie <sup>2,9</sup>, Coen D. A. Stehouwer <sup>2,9</sup>, Miranda T. Schram <sup>2,9,11,12</sup>, Martien C. J. M. van Dongen <sup>1,13</sup> and Simone J. P. M. Eussen <sup>2,13,\*</sup>

**Table S1.** Baseline characteristics of the study population stratified for prevalent depression.

| Characteristic                                      | Total Population<br>(n = 2,857) | No Depression at Baseline<br>(PHQ-9 < 10 and No MDD<br>(MINI))<br>(n = 2,699) | Prevalent Clinically Relevant<br>Depressive Symptoms (PHQ-9 ≥<br>10)<br>(n = 117 Cases) | Prevalent MDD<br>(MINI)<br>(n = 89 Cases) |
|-----------------------------------------------------|---------------------------------|-------------------------------------------------------------------------------|-----------------------------------------------------------------------------------------|-------------------------------------------|
| Sex (women)                                         | 1,431 (50.1)                    | 1,342 (49.7)                                                                  | 72 (61.5)                                                                               | 45 (50.6)                                 |
| Age (years)                                         | 59.7 ± 8.15                     | 59.86 ± 8.11                                                                  | 56.01 ± 7.73                                                                            | 58.73 ± 8.37                              |
| Education                                           |                                 |                                                                               |                                                                                         |                                           |
| Low                                                 | 894 (31.9)                      | 829 (31.3)                                                                    | 45 (39.8)                                                                               | 40 (47.1)                                 |
| Medium                                              | 802 (28.6)                      | 754 (28.5)                                                                    | 36 (31.9)                                                                               | 26 (30.6)                                 |
| High                                                | 1,106 (39.5)                    | 1,067 (40.3)                                                                  | 32 (28.3)                                                                               | 19 (22.4)                                 |
| Smoking                                             |                                 |                                                                               |                                                                                         |                                           |
| Never                                               | 1,009 (35.8)                    | 970 (36.4)                                                                    | 28 (24.8)                                                                               | 20 (23.0)                                 |
| Former                                              | 1,469 (52.1)                    | 1,392 (52.2)                                                                  | 54 (47.8)                                                                               | 49 (56.3)                                 |
| Current                                             | 341 (12.1)                      | 303 (11.4)                                                                    | 31 (27.4)                                                                               | 18 (20.7)                                 |
| Waist circumference (cm)                            | 95.52 ± 13.64                   | 95.14 ± 13.31                                                                 | 102.05 ± 18.40                                                                          | 102.60 ± 17.48                            |
| BMI (kg/m <sup>2</sup> )                            | 26.99 ± 4.50                    | 26.85 ± 4.38                                                                  | 29.42 ± 6.13                                                                            | 29.42 ± 5.92                              |
| Hypertension                                        | 1,593 (55.8)                    | 1,494 (55.4)                                                                  | 73 (62.4)                                                                               | 60 (67.4)                                 |
| Total cholesterol-to-HDL cholesterol ratio          | 3.66 ± 1.17                     | 3.64 ± 1.15                                                                   | 3.84 ± 1.45                                                                             | 3.98 ± 1.37                               |
| History of CVD                                      | 464 (16.5)                      | 427 (16.1)                                                                    | 27 (23.7)                                                                               | 20 (22.7)                                 |
| Diabetes                                            |                                 |                                                                               |                                                                                         |                                           |
| No diabetes                                         | 1,654 (58.4)                    | 1,587 (59.3)                                                                  | 51 (44.0)                                                                               | 38 (43.2)                                 |
| Pre-diabetes                                        | 434 (15.3)                      | 413 (15.4)                                                                    | 16 (13.8)                                                                               | 11 (12.5)                                 |
| T2DM                                                | 769 (26.2)                      | 675 (25.2)                                                                    | 49 (42.2)                                                                               | 39 (44.3)                                 |
| MVPA (hours/week)                                   | 5.50 ± 4.33                     | 5.59 ± 4.3                                                                    | 4.03 ± 4.47                                                                             | 3.64 ± 3.13                               |
| Having a partner (yes)                              | 2,381 (84.6)                    | 2,269 (85.2)                                                                  | 82 (71.9)                                                                               | 67 (77.0)                                 |
| <b>Depression</b>                                   |                                 |                                                                               |                                                                                         |                                           |
| Depression score at baseline (PHQ-9 score)          | 2.71±3.36                       | 2.17±2.24                                                                     | 14.10±4.16                                                                              | 11.76±6.44                                |
| Major depressive disorder at baseline (MINI), n (%) | 89 (3.1)                        | 0                                                                             | 48 (41.0)                                                                               | 89 (100)                                  |
| Use of antidepressants at baseline                  | 187 (6.5)                       | 146 (5.4)                                                                     | 35 (29.9)                                                                               | 26 (29.2)                                 |
| <b>Diet</b>                                         |                                 |                                                                               |                                                                                         |                                           |
| Energy intake (Kcal)                                | 2,180 ± 604                     | 2,180 ± 601                                                                   | 2,145 ± 643                                                                             | 2,218 ± 646                               |
| Protein total (g/day)                               | 85.7 ± 23.0                     | 85.8 ± 22.9                                                                   | 83.8 ± 26.3                                                                             | 84.1 ± 23.0                               |
| Carbohydrates total (g/day)                         | 232.5 ± 69.5                    | 232.3 ± 69.3                                                                  | 234.5 ± 72.6                                                                            | 242.8 ± 73.7                              |
| Fat total (g/day)                                   | 84.3 ± 31.1                     | 84.3 ± 30.9                                                                   | 83.0 ± 32.6                                                                             | 85.9 ± 32.8                               |
| Fatty acids total saturated (g/day)                 | 29.6 ± 12.0                     | 29.6 ± 12.0                                                                   | 29.6 ± 12.0                                                                             | 29.6 ± 12.4                               |
| Fatty acids total monounsaturated (d/day)           | 29.7 ± 11.4                     | 29.7 ± 11.3                                                                   | 29.7 ± 11.4                                                                             | 30.3 ± 11.8                               |

|                                           |             |             |             |             |
|-------------------------------------------|-------------|-------------|-------------|-------------|
| Fatty acids total polyunsaturated (g/day) | 17.7 ± 7.7  | 17.7 ± 7.7  | 17.7 ± 7.7  | 18.8 ± 8.6  |
| Alcohol intake (g/day)                    | 12.2 ± 13.9 | 12.4 ± 13.9 | 9.1 ± 13.8  | 10.7 ± 15.9 |
| DHD, (range 0–140)                        | 83.6 ± 14.7 | 83.8 ± 14.7 | 80.1 ± 14.2 | 80.2 ± 14.2 |
| Mediterranean Score, (range 0–9)          | 4.56 ± 1.64 | 4.57 ± 1.60 | 4.28 ± 1.63 | 4.42 ± 1.62 |
| DASH score, (range 8–40)                  | 24.0 ± 4.5  | 24.1 ± 4.5  | 23.0 ± 4.4  | 23.4 ± 4.1  |

\* Results are presented as mean ± SD or n (%). MDD=Major Depressive Disorder.

**Table S2.** Cross-sectional association of dietary patterns with prevalent clinically relevant depressive symptoms and major depressive disorder.

| Clinical relevant depressive symptoms (PHQ-9 > 10) | Model 1<br>OR (95% CI)<br>n = 112/2,666 | Model 2<br>OR (95% CI)<br>n = 111/2,637 | Model 3<br>OR (95% CI)<br>n = 101/2,483 |
|----------------------------------------------------|-----------------------------------------|-----------------------------------------|-----------------------------------------|
| <b>DHD-score</b>                                   |                                         |                                         |                                         |
| Standardized score*                                | 0.86 (0.70–1.06)                        | 0.90 (0.73–1.11)                        | 0.91 (0.72–1.16)                        |
| Tertiles                                           |                                         |                                         |                                         |
| Low (≤ 77.27) [n=49/912]                           | Ref                                     | Ref                                     | Ref                                     |
| Medium (77.27–90.43) [n=36/914]                    | 0.87 (0.55–1.39)                        | 0.98 (0.61–1.57)                        | 1.09 (0.66–1.81)                        |
| High (> 90.43) [n=32/914]                          | 0.84 (0.51–1.37)                        | 0.93 (0.56–1.55)                        | 0.99 (0.56–1.75)                        |
| Linear trend p-value <sup>+</sup>                  | 0.224                                   | 0.442                                   | 0.850                                   |
| <b>Mediterranean Diet Score</b>                    |                                         |                                         |                                         |
| Standardized score*                                | 0.95 (0.78–1.15)                        | 0.96 (0.79–1.18)                        | 0.99 (0.80–1.24)                        |
| Cut-off**                                          |                                         |                                         |                                         |
| Low (0–3) [n=38/702]                               | Ref                                     | Ref                                     | Ref                                     |
| Medium (4–6) [n=27/614]                            | 0.83 (0.48–1.41)                        | 0.85 (0.50–1.46)                        | 0.73 (0.40–1.32)                        |
| High (6–9) [n=52/1424]                             | 0.86 (0.55–1.34)                        | 0.88 (0.56–1.39)                        | 0.92 (0.57–1.49)                        |
| Linear trend p-value <sup>+</sup>                  | 0.489                                   | 0.405                                   | 0.157                                   |
| <b>DASH score</b>                                  |                                         |                                         |                                         |
| Standardized score*                                | 0.92 (0.75–1.13)                        | 0.97 (0.79–1.19)                        | 1.04 (0.83–1.30)                        |
| Tertiles                                           |                                         |                                         |                                         |
| Low (≤ 22) [n=53/1022]                             | Ref                                     | Ref                                     | Ref                                     |
| Medium (22–26) [n=36/909]                          | 0.87 (0.55–1.37)                        | 0.92 (0.58–1.46)                        | 0.95 (0.58–1.56)                        |
| High (> 26) [n=28/809]                             | 0.99 (0.61–1.62)                        | 1.11 (0.67–1.83)                        | 1.32 (0.77–2.27)                        |
| Linear trend p-value <sup>+</sup>                  | 0.254                                   | 0.461                                   | 0.615                                   |
| <b>Major depressive disorder (MINI)</b>            |                                         |                                         |                                         |
|                                                    | Model 1<br>OR (95% CI)<br>n = 85/2,693  | Model 2<br>OR (95% CI)<br>n = 85/2,663  | Model 3<br>OR (95% CI)<br>n = 75/2,509  |
| <b>DHD-index</b>                                   |                                         |                                         |                                         |
| Standardized score*                                | 0.89 (0.70–1.12)                        | 0.92 (0.73–1.17)                        | 0.99 (0.75–1.30)                        |
| Tertiles                                           |                                         |                                         |                                         |
| Low (≤ 77.27) [n=37/924]                           | Ref                                     | Ref                                     | Ref                                     |
| Medium (77.27–90.43) [n=29/921]                    | 0.94 (0.56–1.58)                        | 1.01 (0.59–1.70)                        | 1.13 (0.64–1.99)                        |
| High (> 90.43) [n=23/923]                          | 0.89 (0.50–1.58)                        | 0.97 (0.54–1.73)                        | 1.09 (0.56–2.14)                        |
| Linear trend p-value <sup>+</sup>                  | 0.259                                   | 0.363                                   | 0.761                                   |
| <b>Mediterranean Diet Score</b>                    |                                         |                                         |                                         |
| Standardized score*                                | 1.03 (0.83–1.30)                        | 1.04 (0.82–1.30)                        | 1.13 (0.87–1.45)                        |
| Cut-off*                                           |                                         |                                         |                                         |
| Low (0–3) [n=25/715]                               | Ref                                     | Ref                                     | Ref                                     |
| Medium (4–6) [n=19/622]                            | 0.95 (0.51–1.77)                        | 0.92 (0.49–1.73)                        | 0.87 (0.43–1.76)                        |
| High (6–9) [n=45/1431]                             | 1.13 (0.68–1.90)                        | 1.13 (0.67–1.90)                        | 1.33 (0.76–2.35)                        |
| Linear trend p-value <sup>+</sup>                  | 0.156                                   | 0.145                                   | <b>0.044</b>                            |
| <b>DASH score</b>                                  |                                         |                                         |                                         |

|                               |                  |                  |                  |
|-------------------------------|------------------|------------------|------------------|
| Standardized score*           | 1.00 (0.79–1.25) | 1.04 (0.82–1.31) | 1.09 (0.84–1.41) |
| Tertiles                      |                  |                  |                  |
| Low ( $\leq 22$ ) [n=36/1039] | <b>Ref</b>       | <b>Ref</b>       | <b>Ref</b>       |
| Medium (22–26) [n=28/917]     | 1.02 (0.61–1.71) | 1.07 (0.63–1.80) | 1.02 (0.58–1.80) |
| High ( $> 26$ ) [n=25/812]    | 1.23 (0.71–2.12) | 1.36 (0.78–2.37) | 1.55 (0.85–2.85) |
| Linear trend p-value +        | 0.878            | 0.670            | 0.724            |

\* Standard deviations for DHD, Mediterranean and DASH diet scores were 14.7, 1.64 and 4.5, respectively.

\*\* Based on literature, Trichopoulou A. et al. (30).

+ Based on median.

Model 1 adjusted for socio-demographic characteristics (age, sex, level of education) and diabetes status.

Model 2 additional adjustment for cardiovascular risk factors: history of CVD, hypertension, total cholesterol and HDL cholesterol, waist circumference) and partner status.

Model 3 additional adjustment for lifestyle factors (MVPA, smoking, and energy intake).

(n cases/non cases), [n=cases/non-cases].

**Table S3.** Sensitivity analysis of the association of dietary patterns with incident clinically relevant depressive symptoms during 7-years of follow-up (median 6.1 years) additionally adjusted.

| Models                   |                                                                                                        | Incident Clinically Relevant Depressive Symptoms (PHQ-9 $\geq 10$ ) HRs (95% CI) |          |                  |
|--------------------------|--------------------------------------------------------------------------------------------------------|----------------------------------------------------------------------------------|----------|------------------|
|                          |                                                                                                        | Standardized score                                                               | Tertiles |                  |
| DHD-score                |                                                                                                        |                                                                                  |          | Low              |
| 1)                       | model 3+ alcohol intake (n= 280)                                                                       | 0.83 (0.73–0.96)                                                                 | Medium   | 0.83 (0.63–1.12) |
|                          |                                                                                                        |                                                                                  | High     | 0.77 (0.55–1.06) |
| 2)                       | model 3 + occupational status (n= 234 cases)                                                           | 0.88 (0.76–1.01)                                                                 | Low      | Ref              |
|                          |                                                                                                        |                                                                                  | Medium   | 0.91 (0.67–1.25) |
|                          |                                                                                                        |                                                                                  | High     | 0.83 (0.59–1.18) |
| 3)                       | model 3 + antidepressant drugs use (n= 280 cases)                                                      | 0.89 (0.78–1.01)                                                                 | Low      | Ref              |
|                          |                                                                                                        |                                                                                  | Medium   | 0.88 (0.66–1.17) |
|                          |                                                                                                        |                                                                                  | High     | 0.87 (0.63–1.20) |
| 4)                       | model 3 + baseline MDD (n= 280 cases)                                                                  | <b>0.86 (0.75–0.98)</b>                                                          | Low      | Ref              |
|                          |                                                                                                        |                                                                                  | Medium   | 0.88 (0.66–1.17) |
|                          |                                                                                                        |                                                                                  | High     | 0.82 (0.60–1.13) |
| 5)                       | model 3 excluding antidepressant users (n= 239 cases)                                                  | 0.88 (0.76–1.01)                                                                 | Low      | Ref              |
|                          |                                                                                                        |                                                                                  | Medium   | 0.82 (0.60–1.12) |
|                          |                                                                                                        |                                                                                  | High     | 0.85 (0.60–1.19) |
| 6)                       | model 3 excluding baseline MDD (n= 264 cases)                                                          | <b>0.87 (0.76–0.99)</b>                                                          | Low      | Ref              |
|                          |                                                                                                        |                                                                                  | Medium   | 0.85 (0.64–1.15) |
|                          |                                                                                                        |                                                                                  | High     | 0.83 (0.60–1.14) |
| 7)                       | model 3 excluding lifetime MDD (n= 126 cases)                                                          | <b>0.73 (0.60–0.90)</b>                                                          | Low      | Ref              |
|                          |                                                                                                        |                                                                                  | Medium   | 0.76 (0.50–1.17) |
|                          |                                                                                                        |                                                                                  | High     | 0.70 (0.44–1.13) |
| 8)                       | model 3 excluding participants with maximum 2 missing PHQ-9 data over 7-years follow-up (n= 280 cases) | <b>0.88 (0.77–1.00)</b>                                                          | Low      | Ref              |
|                          |                                                                                                        |                                                                                  | Medium   | 0.90 (0.68–1.20) |
|                          |                                                                                                        |                                                                                  | High     | 0.81 (0.59–1.11) |
| Mediterranean Diet Score |                                                                                                        | Standardized score                                                               | Cut-off  |                  |
|                          |                                                                                                        |                                                                                  | Low      | Ref              |
| 1)                       | model 3+ alcohol intake (n= 280)                                                                       | 0.92 (0.81–1.05)                                                                 | Medium   | 0.94 (0.68–1.31) |
|                          |                                                                                                        |                                                                                  | High     | 0.96 (0.72–1.28) |
| 2)                       | model 3 + occupational status (n= 234 cases)                                                           | 0.89 (0.78–1.02)                                                                 | Low      | Ref              |
|                          |                                                                                                        |                                                                                  | Medium   | 0.93 (0.67–1.29) |
|                          |                                                                                                        |                                                                                  | High     | 0.93 (0.67–1.28) |
| 3)                       | model 3 + antidepressant drugs use (n= 280 cases)                                                      | 0.92 (0.81–1.04)                                                                 | Low      | Ref              |
|                          |                                                                                                        |                                                                                  | Medium   | 1.03 (0.77–1.39) |
|                          |                                                                                                        |                                                                                  | High     | 0.95 (0.70–1.28) |

|                   |                                                                                                        |                           |                 |                         |
|-------------------|--------------------------------------------------------------------------------------------------------|---------------------------|-----------------|-------------------------|
| 4)                | model 3 + baseline MDD (n= 280 cases)                                                                  | 0.90 (0.80–1.02)          | Low             | Ref                     |
|                   |                                                                                                        |                           | Medium          | 0.94 (0.70–1.27)        |
|                   |                                                                                                        |                           | High            | 0.91 (0.67–1.22)        |
| 5)                | model 3 excluding antidepressant users (n= 239 cases)                                                  | 0.90 (0.79–1.04)          | Low             | Ref                     |
|                   |                                                                                                        |                           | Medium          | 0.96 (0.70–1.33)        |
|                   |                                                                                                        |                           | High            | 0.97 (0.70–1.33)        |
| 6)                | model 3 excluding baseline MDD (n= 264 cases)                                                          | 0.90 (0.79–1.02)          | Low             | Ref                     |
|                   |                                                                                                        |                           | Medium          | 0.99 (0.73–1.34)        |
|                   |                                                                                                        |                           | High            | 0.89 (0.65–1.22)        |
| 7)                | model 3 excluding lifetime MDD (n= 126 cases)                                                          | <b>0.79 (0.65–0.96)</b>   | Low             | Ref                     |
|                   |                                                                                                        |                           | Medium          | 1.01 (0.65–1.56)        |
|                   |                                                                                                        |                           | High            | 0.96 (0.61–1.50)        |
| 8)                | model 3 excluding participants with maximum 2 missing PHQ-9 data over 7-years follow-up (n= 280 cases) | 0.90 (0.80–1.02)          | Low             | Ref                     |
|                   |                                                                                                        |                           | Medium          | 0.97 (0.72–1.31)        |
|                   |                                                                                                        |                           | High            | 0.89 (0.66–1.20)        |
| <b>DASH score</b> |                                                                                                        | <b>Standardized score</b> | <b>Tertiles</b> |                         |
| 1)                | model 3+ alcohol intake (n= 280)                                                                       | 0.95 (0.83–1.07)          | Low             | Ref                     |
|                   |                                                                                                        |                           | Medium          | 1.06 (0.81–1.39)        |
|                   |                                                                                                        |                           | High            | 0.83 (0.60–1.15)        |
| 2)                | model 3 + occupational status (n= 234 cases)                                                           | 0.91 (0.79–1.05)          | Low             | Ref                     |
|                   |                                                                                                        |                           | Medium          | 0.97 (0.73–1.31)        |
|                   |                                                                                                        |                           | High            | 0.75 (0.52–1.07)        |
| 3)                | model 3 + antidepressant drugs use (n= 280 cases)                                                      | 0.94 (0.83–1.07)          | Low             | Ref                     |
|                   |                                                                                                        |                           | Medium          | 1.05 (0.80–1.38)        |
|                   |                                                                                                        |                           | High            | 0.85 (0.62–1.18)        |
| 4)                | model 3 + baseline MDD (n= 280 cases)                                                                  | 0.94 (0.83–1.07)          | Low             | Ref                     |
|                   |                                                                                                        |                           | Medium          | 1.05 (0.80–1.38)        |
|                   |                                                                                                        |                           | High            | 0.82 (0.60–1.13)        |
| 5)                | model 3 excluding antidepressant users (n= 239 cases)                                                  | 0.95 (0.83–1.09)          | Low             | Ref                     |
|                   |                                                                                                        |                           | Medium          | 1.03 (0.77–1.38)        |
|                   |                                                                                                        |                           | High            | 0.86 (0.61–1.21)        |
| 6)                | model 3 excluding baseline MDD (n= 264 cases)                                                          | 0.95 (0.84–1.09)          | Low             | Ref                     |
|                   |                                                                                                        |                           | Medium          | 1.06 (0.80–1.40)        |
|                   |                                                                                                        |                           | High            | 0.83 (0.59–1.16)        |
| 7)                | model 3 excluding lifetime MDD (n= 126 cases)                                                          | 0.83 (0.69–1.01)          | Low             | Ref                     |
|                   |                                                                                                        |                           | Medium          | 1.19 (0.81–1.76)        |
|                   |                                                                                                        |                           | High            | <b>0.56 (0.33–0.97)</b> |
| 8)                | model 3 excluding participants with maximum 2 missing PHQ-9 data over 7-years follow-up (n= 280 cases) | 0.95 (0.84–1.08)          | Low             | Ref                     |
|                   |                                                                                                        |                           | Medium          | 1.07 (0.82–1.40)        |
|                   |                                                                                                        |                           | High            | 0.85 (0.61–1.17)        |

Model 3: age, sex, level of education, diabetes status, history of CVD, hypertension, total cholesterol and HDL cholesterol, waist circumference, partner status, MVPA, smoking, and energy intake.
